# Supplementary material for: Effect of Seed Traits and Waterbird Species on the Dispersal Effectiveness of Wetland Plants
Source: MDPI journal article supplement (doi:10.3390/biology11050629), 2022-04-20
Supplement: s1 [file s1]

Supplementary Materials

# Effect of Seed Traits and Waterbird Species on the Dispersal Effectiveness of Wetland Plants

Shenghong Nie, Lizhi Zhou and Wenbin Xu

**Table S1.** Summary of generalized linear mixed models (GLMMs) selection for investigating the effects of dispersal Scheme 10. and the Null model with only the constant and random factors. K is the number of estimated parameters, Wt the weight per model and LogLik is the -2log-likelihood output for each model. Each model has fixed and random effects.

**LMM1a:** Average retention time ( $T_{ave}$ ); Random effects = (1 | ID) + (1 | SS)

| Fixed Effects                           | K  | AIC <sub>c</sub> | ΔAIC <sub>c</sub> | Wt   | LogLik |
|-----------------------------------------|----|------------------|-------------------|------|--------|
| BS + SL + SLI + BS*SLI                  | 8  | -8.74            | 0.00              | 0.22 | 14.22  |
| SL + SLI                                | 6  | -8.60            | 0.14              | 0.20 | 11.32  |
| BS + SL + SLI                           | 7  | -8.34            | 0.40              | 0.18 | 12.57  |
| BS + SL + SLI + BS*SL + BS*SLI          | 9  | -7.04            | 1.70              | 0.09 | 14.89  |
| SL + SLI + SL*SLI                       | 7  | -6.13            | 2.61              | 0.06 | 11.47  |
| BS + SL + SLI + BS*SLI + SL*SLI         | 9  | -5.98            | 2.75              | 0.06 | 14.36  |
| BS + SL + SLI + BS*SL                   | 8  | -5.79            | 2.95              | 0.05 | 12.74  |
| BS + SL + SLI + SL*SLI                  | 8  | -5.74            | 3.00              | 0.05 | 12.71  |
| BS + SL + SLI + BS*SL + BS*SLI + SL*SLI | 10 | -4.12            | 4.62              | 0.02 | 15.03  |
| BS + SL + SLI + BS*SL + SL*SLI          | 9  | -3.03            | 5.71              | 0.01 | 12.88  |
| SL                                      | 5  | -2.99            | 5.75              | 0.01 | 7.21   |
| BS + SL                                 | 6  | -2.71            | 6.03              | 0.01 | 8.38   |
| Null                                    | 4  | -1.78            | 6.96              | 0.00 | 5.35   |

BS: dispersal species, SL: seed length, SLI: seed lignin, \* refers to interaction of fixed factors

ID: dispersal individual, SS: seed species

**LMM1b:** Maximum retention time ( $T_{max}$ ); Random effects = (1 | ID) + (1 | SS)

| Fixed Effects                   | K | AIC <sub>c</sub> | ΔAIC <sub>c</sub> | Wt   | LogLik |
|---------------------------------|---|------------------|-------------------|------|--------|
| BS + SLI + BS*SL I              | 7 | 55.99            | 0.00              | 0.19 | -19.60 |
| BS + SLI                        | 6 | 56.48            | 0.49              | 0.15 | -21.22 |
| BS + SL + SLI + BS*SLI          | 8 | 56.95            | 0.96              | 0.12 | -18.63 |
| BS + SL + SLI                   | 7 | 57.31            | 1.32              | 0.10 | -20.25 |
| BS + SL + SLI + BS*SLI + SL*SLI | 9 | 58.01            | 2.02              | 0.07 | -17.63 |
| SLI                             | 5 | 58.20            | 2.21              | 0.06 | -23.39 |
| BS + SL + SLI + SL*SLI          | 8 | 58.21            | 2.21              | 0.06 | -19.26 |
| BS + SL + SLI + BS*SL           | 8 | 58.46            | 2.47              | 0.06 | -19.39 |
| SL + SLI                        | 6 | 58.96            | 2.97              | 0.04 | -22.46 |
| BS + SL + SLI + BS*SL + BS*SLI  | 9 | 59.19            | 3.20              | 0.04 | -18.23 |
| BS + SL + SLI + BS*SL + SL*SLI  | 9 | 59.52            | 3.53              | 0.03 | -18.39 |

|                                         |    |       |      |      |        |
|-----------------------------------------|----|-------|------|------|--------|
| SL + SLI + SL*SLI                       | 7  | 59.80 | 3.81 | 0.03 | -21.50 |
| BS + SL + SLI + BS*SL + BS*SLI + SL*SLI | 10 | 60.40 | 4.41 | 0.02 | 17.23  |
| BS                                      | 5  | 63.53 | 7.54 | 0.00 | -26.05 |
| Null                                    | 4  | 65.15 | 9.16 | 0.00 | -28.11 |

BS: dispersal species, SL: seed length, SLI: seed lignin, \* refers to interaction of fixed factors

ID: dispersal individual, SS: seed species

**GLMM2:** Retrieval; Random effects = (1|ID) + (1|SS)

| Fixed Effects                           | K | AIC <sub>c</sub> | ΔAIC <sub>c</sub> | Wt   | LogLik  |
|-----------------------------------------|---|------------------|-------------------|------|---------|
| BS + SLI + BS*SLI                       | 6 | 279.14           | 0.00              | 0.21 | -132.54 |
| BS + SLI                                | 5 | 279.25           | 0.12              | 0.19 | -133.91 |
| BS + SL + SLI + BS*SL                   | 7 | 280.07           | 0.94              | 0.13 | -131.64 |
| BS + SL + SLI                           | 6 | 280.97           | 1.83              | 0.08 | -133.46 |
| BS + SL + SLI + BS*SLI                  | 7 | 280.98           | 1.85              | 0.08 | -132.09 |
| BS+ SL + SLI + BS*SL + SL*SLI           | 8 | 281.00           | 1.86              | 0.08 | -130.65 |
| BS + SL + BS*SL + BS*SLI                | 8 | 281.59           | 2.46              | 0.06 | -130.95 |
| BS + SL + SLI + SL*SLI                  | 7 | 281.79           | 2.66              | 0.05 | -132.50 |
| BS + SL + SLI + BS*SLI + SL*SLI         | 8 | 282.00           | 2.87              | 0.05 | -131.16 |
| BS + SL + SLI + BS*SL + BS*SLI + SL*SLI | 9 | 282.77           | 3.63              | 0.03 | -130.06 |
| BS                                      | 4 | 285.29           | 6.16              | 0.01 | -138.18 |
| BS + SL + BS*SL                         | 6 | 285.46           | 6.34              | 0.01 | -135.71 |
| BS + SL                                 | 5 | 286.42           | 7.28              | 0.01 | -137.50 |
| Null                                    | 3 | 298.40           | 19.26             | 0.00 | -145.93 |

BS: dispersal species, SL: seed length, SLI: seed lignin, \* refers to interaction of fixed factors

ID: dispersal individual, SS: seed species

**GLMM3:** Germinated; Random effects = (1|ID) + (1|SS)

| Fixed Effects     | K | AIC <sub>c</sub> | ΔAIC <sub>c</sub> | Wt   | LogLik |
|-------------------|---|------------------|-------------------|------|--------|
| SLI               | 4 | 159.41           | 0.00              | 0.37 | -75.24 |
| BS + SLI          | 5 | 161.20           | 1.79              | 0.15 | -74.88 |
| SL + SLI          | 5 | 161.34           | 1.93              | 0.14 | -74.95 |
| BS + SL + SLI     | 6 | 163.19           | 3.78              | 0.06 | -74.57 |
| BS + SLI + BS*SLI | 6 | 163.26           | 3.86              | 0.05 | -74.61 |
| Null              | 3 | 163.46           | 4.06              | 0.05 | -78.46 |

BS: dispersal species, SL: seed length, SLI: seed lignin, \* refers to interaction of fixed factors

ID: dispersal individual, SS: seed species

**GLMM4a:** Recovered within time interval (RT|Retrieval); Random effects = (RT|ID)

| Fixed Effects                                          | K | AIC <sub>c</sub> | ΔAIC <sub>c</sub> | Wt   | LogLik  |
|--------------------------------------------------------|---|------------------|-------------------|------|---------|
| BS + RT + RT <sup>2</sup>                              | 7 | 225.71           | 0.00              | 0.33 | -103.85 |
| BS + RT <sup>2</sup>                                   | 6 | 225.91           | 0.21              | 0.30 | -105.51 |
| BS + RT + RT <sup>2</sup> + BS*RT                      | 8 | 227.14           | 1.44              | 0.16 | -102.91 |
| BS + RT + RT <sup>2</sup> + BS*RT <sup>2</sup>         | 8 | 228.30           | 2.59              | 0.09 | -103.48 |
| BS + RT <sup>2</sup> + BS*RT <sup>2</sup>              | 7 | 228.59           | 2.88              | 0.08 | -105.30 |
| BS + RT + RT <sup>2</sup> + BS*RT + BS*RT <sup>2</sup> | 9 | 229.46           | 3.76              | 0.05 | -102.27 |
| Null                                                   | 4 | 271.73           | 46.02             | 0.00 | -131.22 |

BS: dispersal species, RT: retention time, RT<sup>2</sup>: retention time squared, \* refers to interaction of fixed factors

RT|ID: dispersal individual within time interval

**GLMM4b:** Germinated within time interval (RT|Germination); Random effects = (RT|ID)

| Fixed Effects                                          | K | AIC <sub>c</sub> | ΔAIC <sub>c</sub> | Wt   | LogLik |
|--------------------------------------------------------|---|------------------|-------------------|------|--------|
| BS + RT <sup>2</sup>                                   | 6 | 167.76           | 0.00              | 0.50 | -76.43 |
| BS + RT <sup>2</sup> + BS*RT <sup>2</sup>              | 7 | 169.84           | 2.09              | 0.17 | -75.92 |
| BS + RT + RT <sup>2</sup>                              | 7 | 170.49           | 2.73              | 0.13 | -76.25 |
| BS + RT + RT <sup>2</sup> + BS*RT                      | 8 | 172.23           | 4.47              | 0.05 | -75.45 |
| BS + RT + RT <sup>2</sup> + BS*RT <sup>2</sup>         | 8 | 172.75           | 4.99              | 0.04 | -75.71 |
| BS + RT                                                | 6 | 172.84           | 5.08              | 0.04 | -78.97 |
| RT <sup>2</sup>                                        | 5 | 173.38           | 5.62              | 0.03 | -80.69 |
| BS + RT + BS*RT                                        | 7 | 174.62           | 6.87              | 0.02 | -78.31 |
| BS + RT + RT <sup>2</sup> + BS*RT + BS*RT <sup>2</sup> | 9 | 175.18           | 7.42              | 0.01 | -75.13 |
| RT + RT <sup>2</sup>                                   | 6 | 175.93           | 8.17              | 0.01 | -80.51 |
| Null                                                   | 4 | 190.96           | 23.21             | 0.00 | -90.84 |

BS: dispersal species, RT: retention time, RT<sup>2</sup>: retention time squared, \* refers to interaction of fixed factors

RT|ID: dispersal individual within time interval

**GLMM5:** Treatment (TT); Random effects = (1|ID)

| Fixed Effects | K  | AIC <sub>c</sub> | ΔAIC <sub>c</sub> | Wt   | LogLik  |
|---------------|----|------------------|-------------------|------|---------|
| TT + SS       | 10 | 292.10           | 0.00              | 0.66 | -134.62 |
| TT            | 3  | 294.07           | 1.96              | 0.25 | -143.89 |
| Null          | 2  | 296.73           | 4.63              | 0.07 | -146.29 |

SS: seed species, TT: treatment, \* refers to interaction of fixed factors

ID: dispersal individual
